# Supplementary material for: Safety Evaluation of the MiniMed 670G System in Children 7–13 Years of Age with Type 1 Diabetes
Source: PubMed Central journal article supplement (PMC6350071; doi:10.1089/dia.2018.0264), 2019-01-07
Supplement: Supp_Table1.pdf [file Supp_Table1.pdf]

## Supplementary Data

SUPPLEMENTARY TABLE S1. NIGHT-TIME SENSOR GLUCOSE, GLYCEMIC CONTROL, VARIABILITY, AND INSULIN DELIVERED DURING THE RUN-IN AND STUDY PHASE

|                                                          | <i>Run-in phase</i>         | <i>Study phase</i>         | P                   |
|----------------------------------------------------------|-----------------------------|----------------------------|---------------------|
| SG, mg/dL                                                | 166±26 (163, 148–184)       | 155±13 (153, 145–162)      | <0.001              |
| Percentage of sensor glucose values across ranges, mg/dL |                             |                            |                     |
| ≤50                                                      | 1.0±1.6 (0.3, 0.0–1.2)      | 0.5±0.6 (0.3, 0.1–0.7)     | 0.0125 <sup>†</sup> |
| ≤54                                                      | 1.5±2.2 (0.5, 0.0–2.0)      | 0.7±0.7 (0.5, 0.2–1.0)     | <0.001 <sup>†</sup> |
| ≤60                                                      | 2.4±3.2 (1.2, 0.4–3.5)      | 1.2±1.0 (0.8, 0.4–1.6)     | <0.001 <sup>†</sup> |
| ≤70                                                      | 4.9±5.2 (3.3, 1.4–7.4)      | 2.4±1.6 (1.9, 1.1–3.5)     | <0.001 <sup>†</sup> |
| 70–140                                                   | 35.4±14.7 (35.0, 24.6–46.2) | 48.6±8.1 (48.9, 42.4–54.1) | <0.001              |
| >70–180                                                  | 56.6±15.3 (57.5, 47.7–67.4) | 70.9±9.4 (72.0, 64.3–77.6) | <0.001 <sup>†</sup> |
| >180                                                     | 38.5±16.7 (37.6, 27.8–49.0) | 26.7±9.0 (25.7, 20.1–33.1) | <0.001              |
| >250                                                     | 11.7±8.9 (9.7, 4.7–17.4)    | 7.8±5.1 (6.8, 3.6–11.0)    | <0.001 <sup>†</sup> |
| >300                                                     | 3.8±4.0 (2.6, 0.4–5.7)      | 2.6±2.4 (1.9, 0.8–3.5)     | <0.001 <sup>†</sup> |
| Within-day SD of SG, mg/dL                               | 42.1±7.9 (43.2, 37.0–47.4)  | 39.6±6.3 (39.1, 34.8–44.2) | <0.001 <sup>†</sup> |
| Within-day CV of SG, %                                   | 26.2±4.7 (25.6, 23.2–29.5)  | 25.5±3.0 (25.6, 23.6–27.4) | 0.1079              |
| TDD, U/(kg·d)*                                           | 0.2±0.1 (0.2, 0.2–0.2)      | 0.2±0.0 (0.2, 0.2–0.2)     | 0.0572              |
| Basal insulin as % of TDD*                               | 72.2±11.7 (73.8, 63.9–82.7) | 75.9±7.9 (76.5, 72.5–82.0) | <0.001              |

The run-in phase duration was 2 weeks and the study phase duration was 3 months. All values are shown as mean±SD (median, interquartile range).

\*One participant's height and weight were not captured at enrollment.

<sup>†</sup>Wilcoxon signed-rank test.

CV, coefficient of variation; SD, standard deviation; SG, sensor glucose; TDD, total daily dose of insulin, includes basal + microbolus.
